# Supplementary material for: Effect of a Community Agency–Administered Nurse Home Visitation Program on Program Use and Maternal and Infant Health Outcomes: A Randomized Clinical Trial
Source: PubMed Central journal article supplement (PMC6826644; doi:10.1001/jamanetworkopen.2019.14522), 2019-11-01
Supplement: jamanetwopen-2-e1914522-s002.pdf [file jamanetwopen-2-e1914522-s002.pdf]

## Data Sharing Statement

Dodge KA, Goodman WB, Bai Y, O'Donnell K, Murphy RA. Effect of a community agency-administered nurse home visitation program on program use and maternal and infant health outcomes: a randomized clinical trial. *JAMA Netw Open*. 2019;2(11):e1914522. 10.1001/jamanetworkopen.2019.14522

### Data

**Data available:** Yes

**Data types:** Other (please specify)

**Additional Information:** De-identified, upon receipt of an approved IRB and plan

**How to access data:** Data will be available by direct transfer.

**When available:** With publication

### Supporting Documents

**Document types:** Other (please specify)

**Additional Information:** Codebooks

**How to access documents:** Codebooks

**When available:** With publication

### Additional Information

**Who can access the data:** Researchers with an IRB approval and proposal.

**Types of analyses:** Any

**Mechanisms of data availability:** After approval

**Any additional restrictions:** None
